# Supplementary material for: A Role for Progesterone-Regulated sFRP4 Expression in Uterine Leiomyomas
Source: Oxford University Press journal article supplement (doi:10.1210/jc.2016-4014), 2017-06-14
Supplement: jc.2016-4014_Supplemental_Figure_1-5_and_Table_1-2.pdf [file jc.2016-4014_Supplemental_Figure_1-5_and_Table_1-2.pdf]

**Figure S1.** Unsupervised K-mean clustering on ESR1 expression reveals four outlier samples.

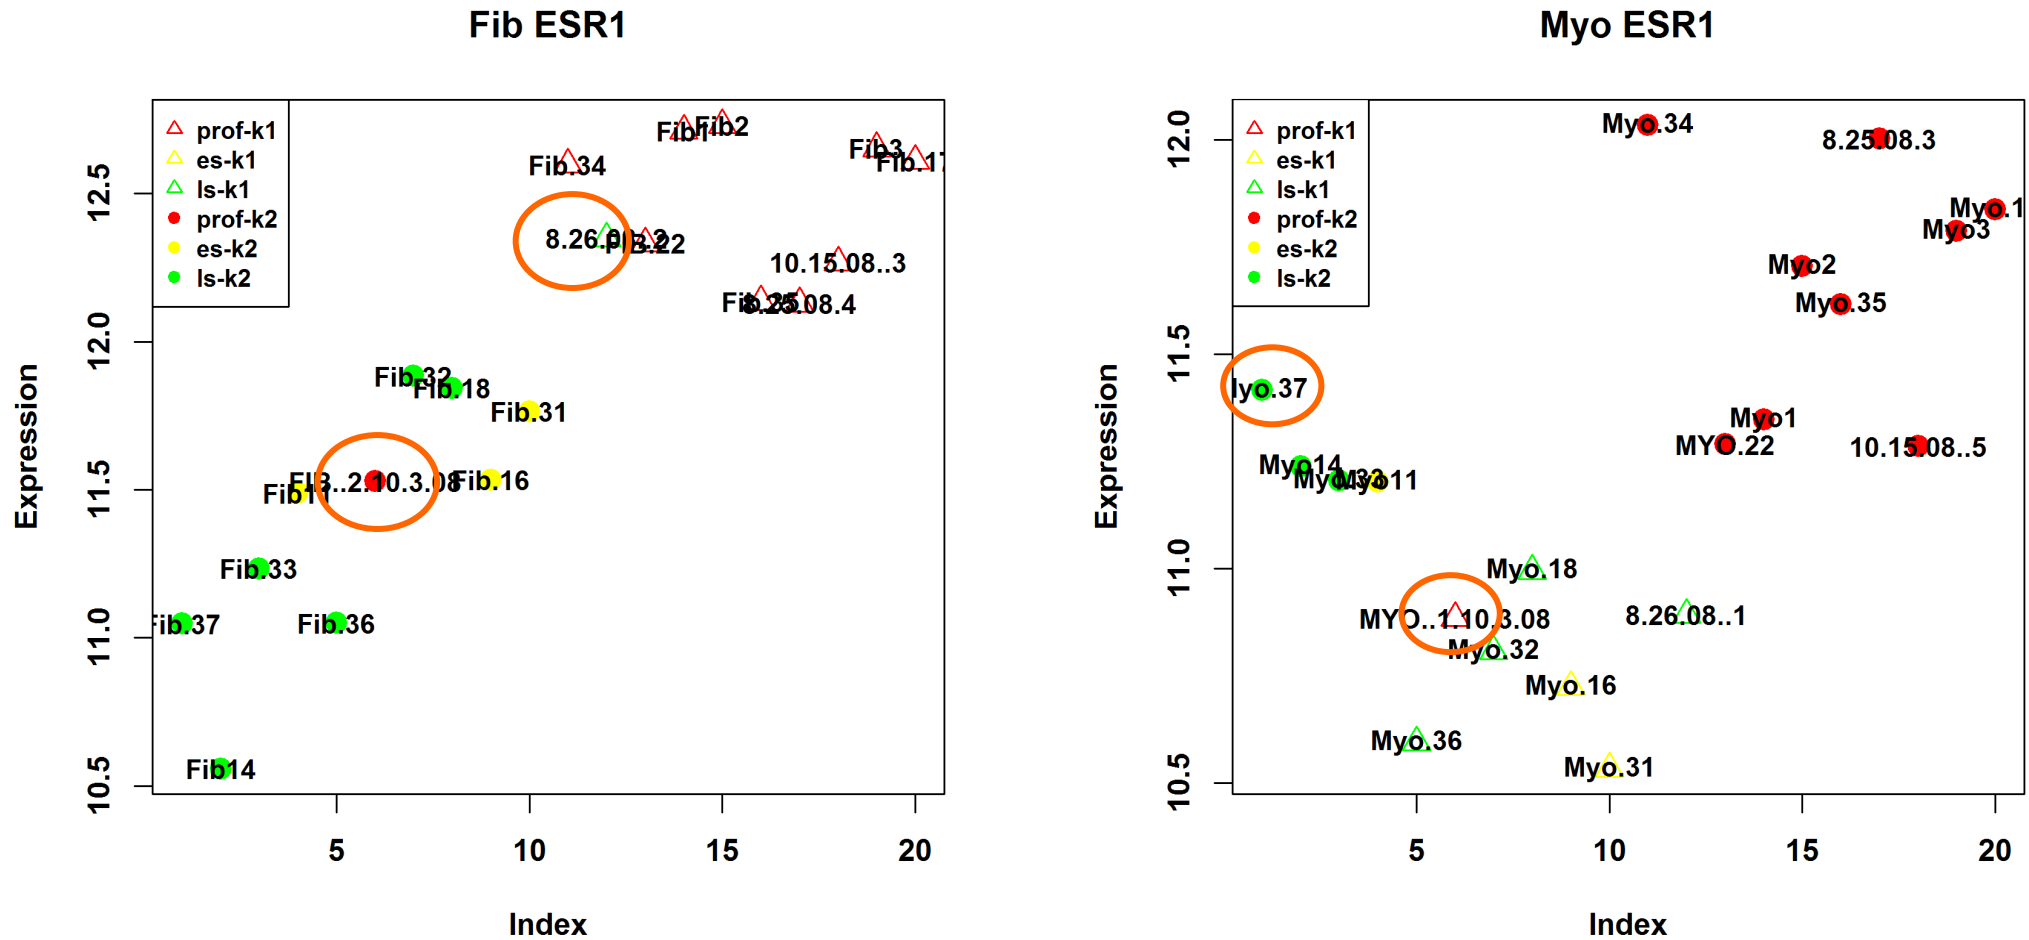

- 10.3.08 (proliferative) always low as secretory in both tissues.
- 8.26.08 (late secretory) high as proliferative in fibroid (leiomyoma).
- Myo.37 (late secretory) high as proliferative in myometrium.

**Figure S2.** Differentially expressed gene products whose levels were initially found to decrease in leiomyomas with progression through the menstrual cycle.

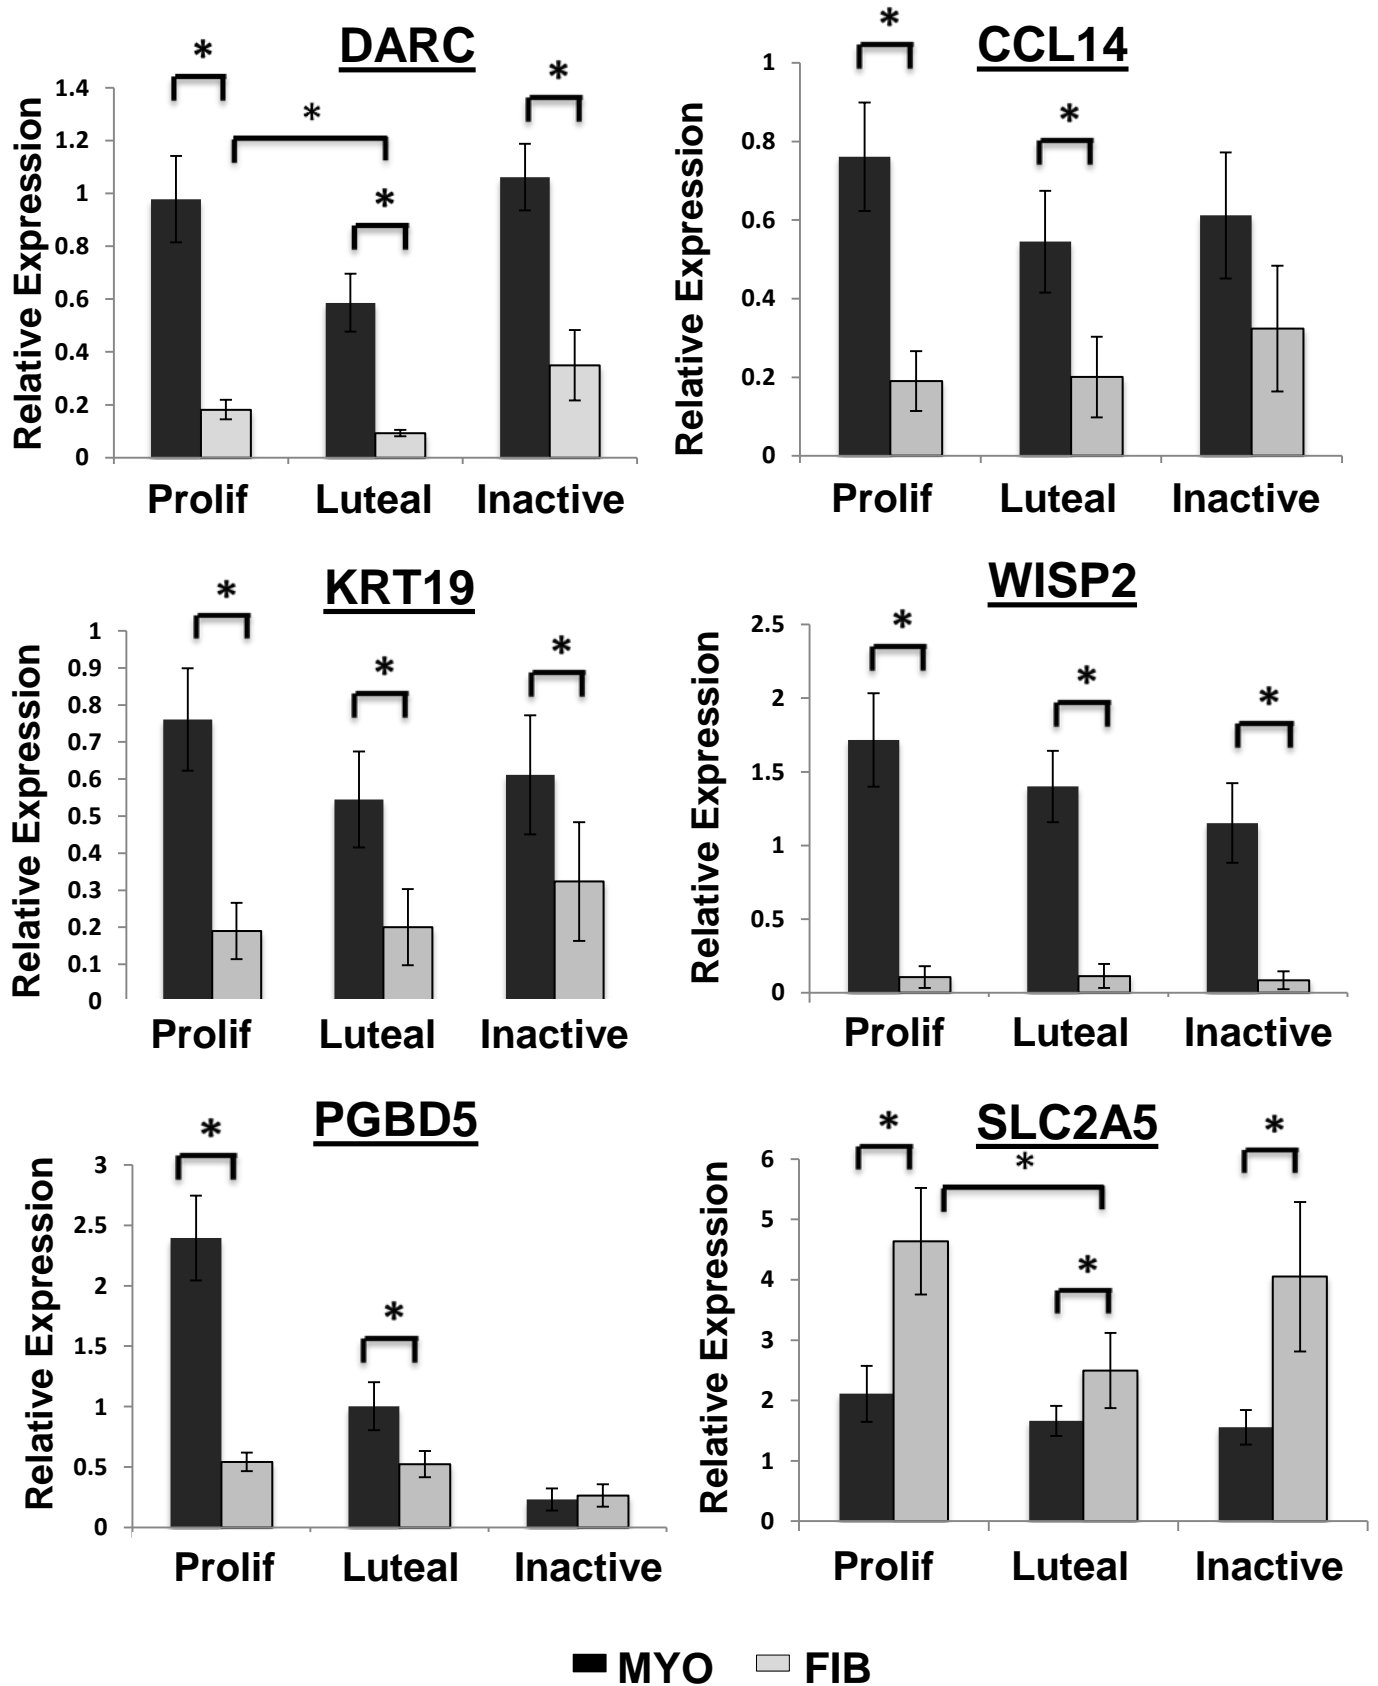

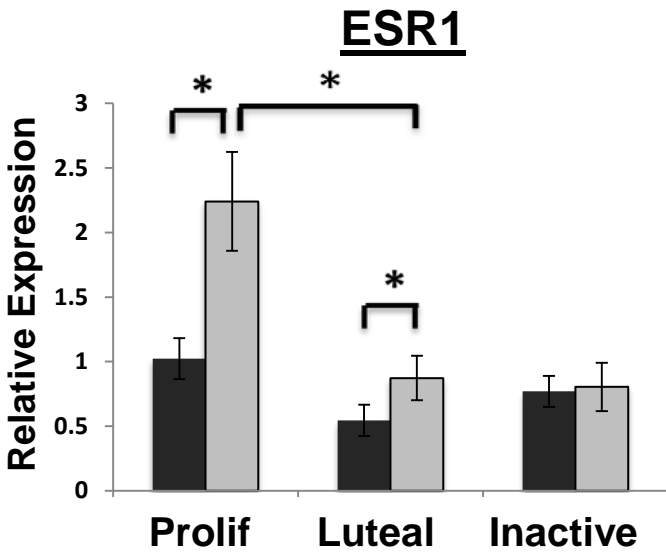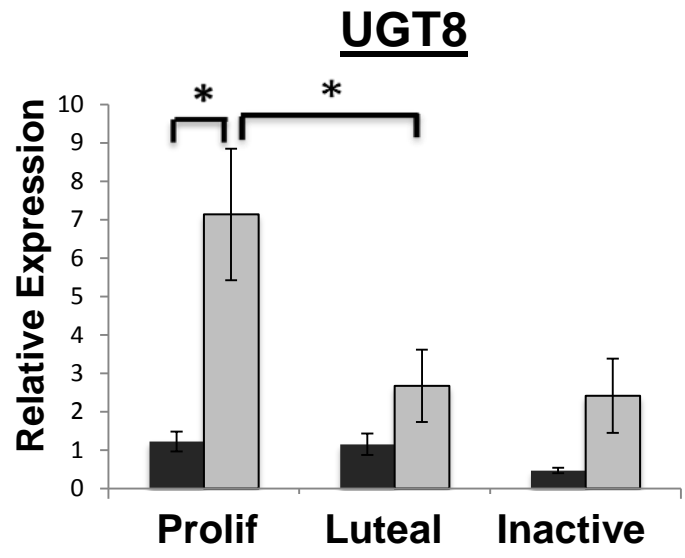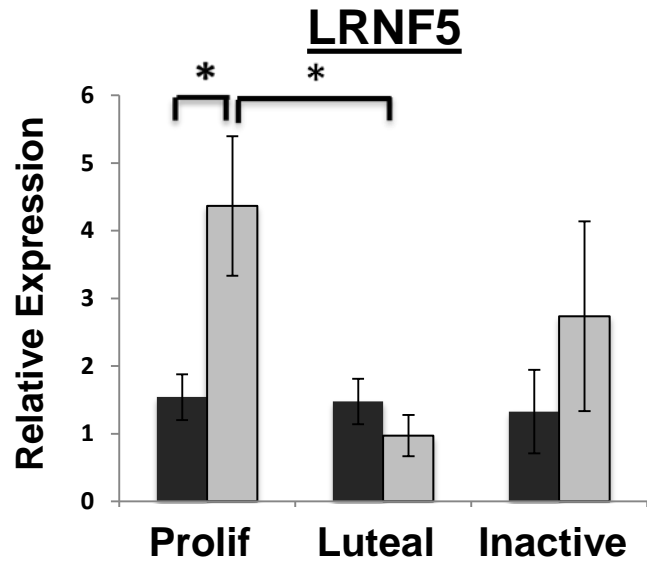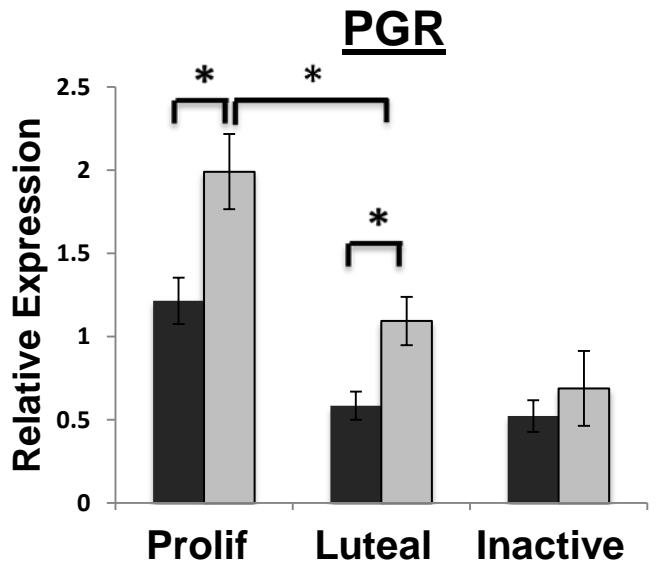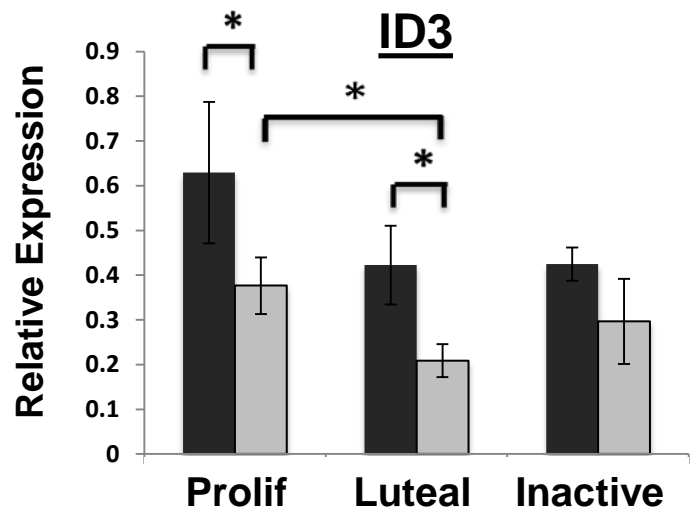

■ MYO    ■ FIB

**Figure S3:** Differentially expressed gene products whose levels were initially found to increase in leiomyomas with progression through the menstrual phase.

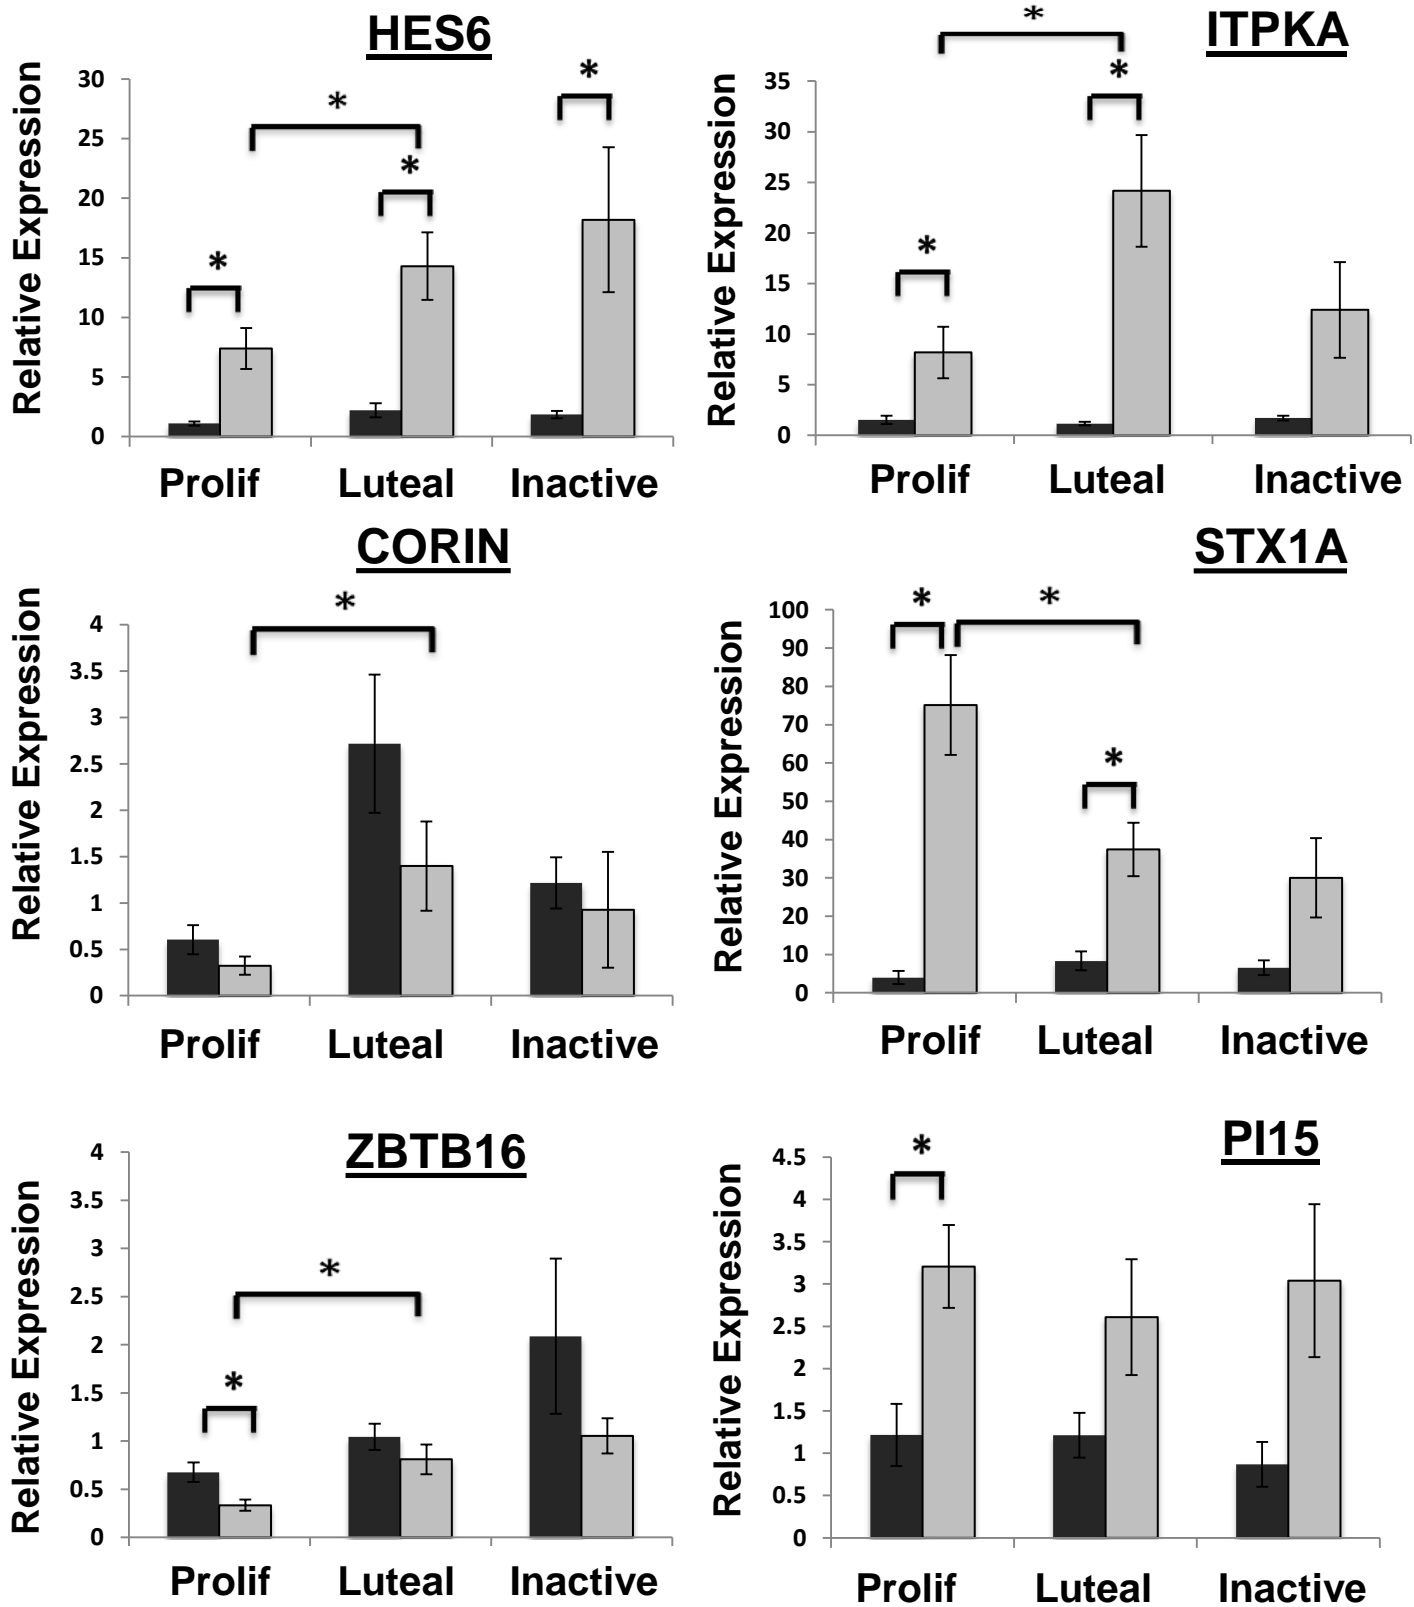

### RHBDL3

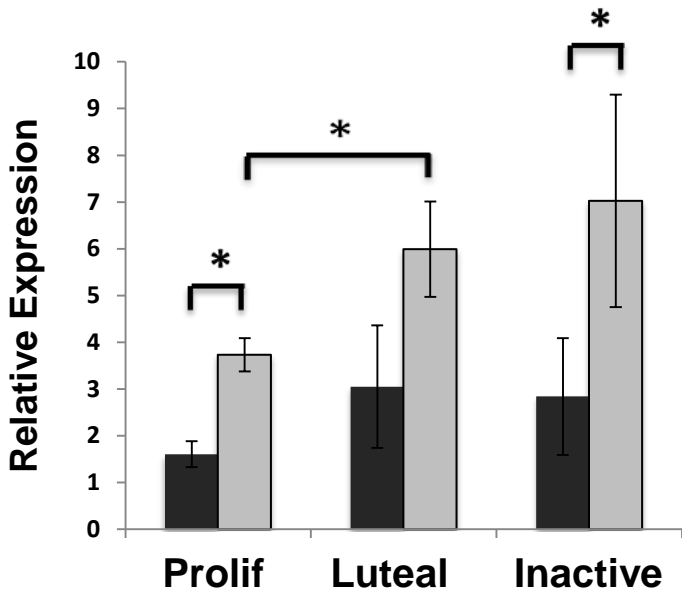

### ARHGEF18

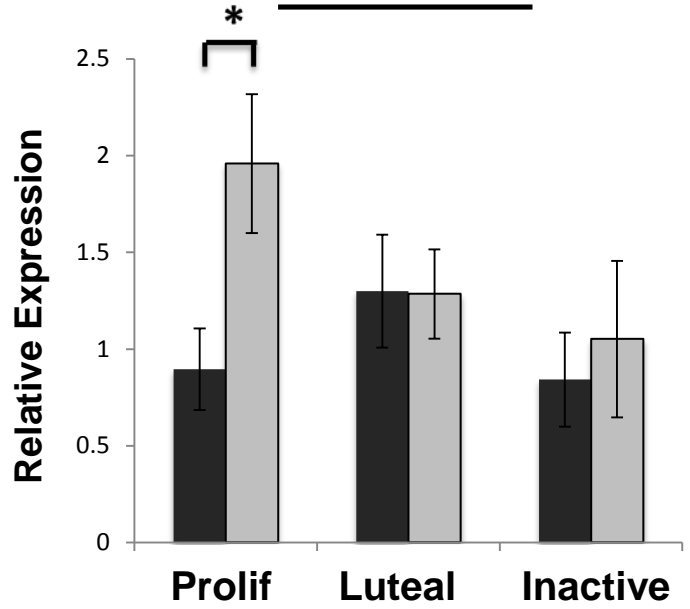

### PRKD1

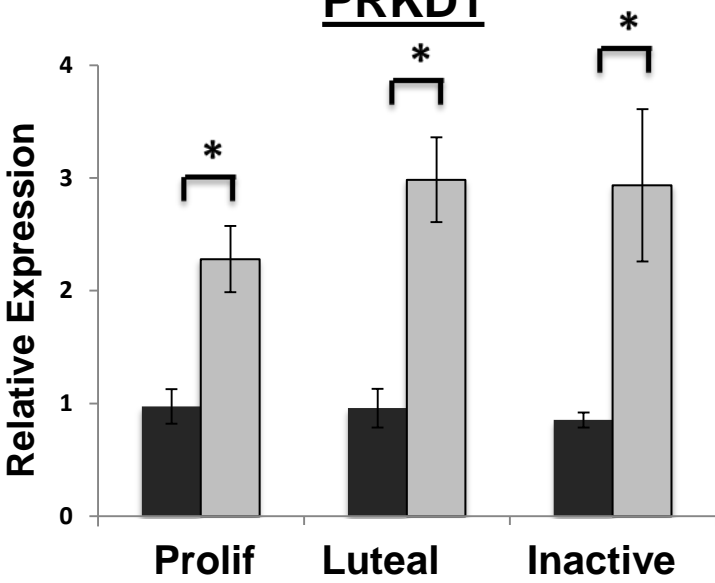

### C1QL1

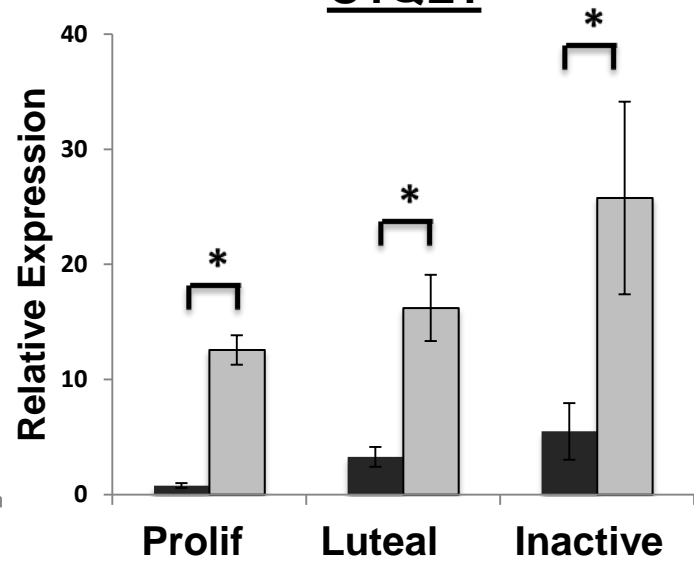

**Figure S4.** Relative expression of gene products identified as key progesterone-regulated “hubs” by GeneMania analysis

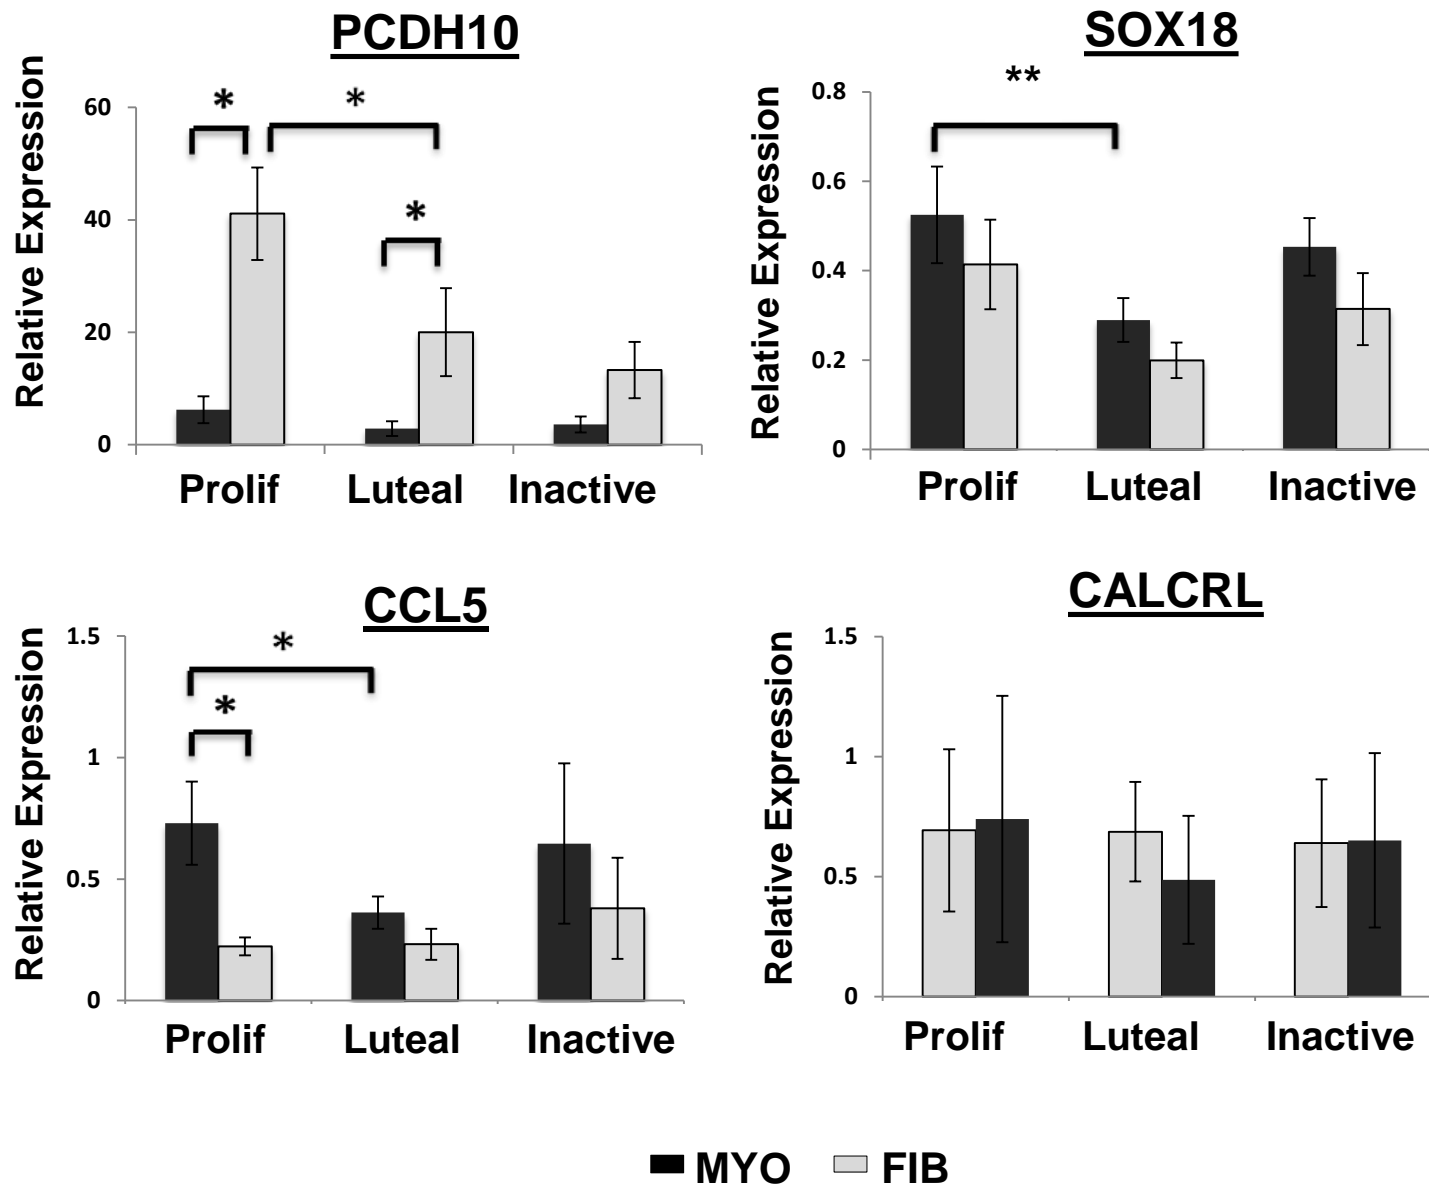

Figure S5.

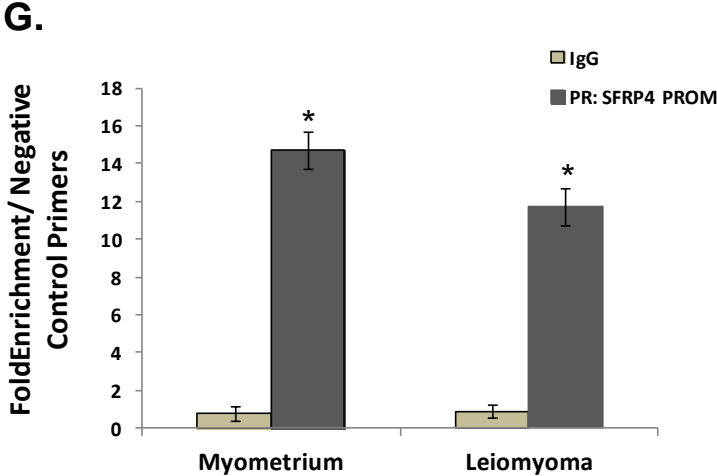

**Table S1.** Primers used to evaluate the expression of putative progesterone-regulated gene products.

| <u>Gene</u>           | <u>Forward Primer (5'-&gt;3')</u> | <u>Reverse Primer (5'-&gt;3')</u> |
|-----------------------|-----------------------------------|-----------------------------------|
| <i>ITPKA</i>          | AGCACCGACTTCAAGACTACGC            | CCTCCTGAAGAACTCGGATACC            |
| <i>STX1A</i>          | TGGAGAACAGCATCCGTGAGCT            | CCTCTCCACATAGTCTACCGCG            |
| <i>ARHGEF18</i>       | TTCAGCCTGCCCCAAGAGGAAA            | TCTAGGAGGCTCTGTGCGATCA            |
| <i>PRKD1</i>          | GAGGACGCCAACAGAACCATCA            | CTGTGCTGCTTTTCTCTTCGTG            |
| <i>C1QL1</i>          | AGTATGTGGGCAGACCTCTGCA            | CCAGCTTGATGAAGACCTCGTC            |
| <i>TMEPA1</i>         | CTGAGCCACTACAAGCTGTCTG            | GGATTCCGTTGCCTGACACTGT            |
| <i>PI15</i>           | TCGCAGAATGACATGATCGC              | TGGTCCCAAATGCAAGTAGC              |
| <i>UGT8</i>           | GGAGGAATCCTAACCAAACAG             | TCCTGCCAGTTTGTAGCAATGT            |
| <i>ESR1</i>           | GCTTACTGACCAACCTGGCAGA            | GGATCTCTAGCCAGGCACATTC            |
| <i>SFRP5</i>          | CTGAGATGCTGCACTGCCACAA            | GTCAGCACTGTGCTCCATCTCA            |
| <i>DARC</i>           | GGGCTGAAGAAGGCATTGGGTA            | CTTGGACCTCACCAGGAAAATCC           |
| <i>CCL14</i>          | TGATGTCAAAGCTTCCACTGGAA           | GAGTGAACACGGGATGCTTTGT            |
| <i>KRT19</i>          | ATGCAGATCGAAGGCCTGAA              | TTGGCTTCGCATGTCACTCA              |
| <i>WISP2</i>          | CCTGCGACCAACTCCACGTCT             | TTCACCTCACAGCTGCTGTGCT            |
| <i>SLC2A5</i>         | GGCTTCTCCATCTGCCTCATAG            | GGAGATGACACAGACGATGCTG            |
| <i>ID3</i>            | CAGCTTAGCCAGGTGGAAATCC            | GTCGTTGGAGATGACAAGTTCC            |
| <i>LRFN5</i>          | GCAGAAGCTACATCATCAACGG            | GACCAGAAAAGTTTTGCTCGTAG           |
| <i>ID1</i>            | GTTGGAGCTGAACTCGGAATCC            | ACACAAGATGCGATCGTCCGCA            |
| <i>CPXM2</i>          | CAGAGGATCGACAGAATGTCCC            | CATCCAGGCTATGACTGCTCTG            |
| <i>PGBD5</i>          | CAAACCCAGGTGCTACATGA              | GCTTATTCTTCAGCGCATCC              |
| <i>CORIN</i>          | GTTCCCAGACTGCCCTGATTAC            | ACTGTCTGAGCAGTCGGCTTCA            |
| <i>ZBTB16</i>         | GAGCTTCTGATAACGAGGCTG             | AGCCGCAAATATCCAGGAACC             |
| <i>RHBDL3</i>         | GAACACCTGGGACTCAATGTGG            | TGTCAGCCACAGACACTGCCAA            |
| <i>SFRP4 Promoter</i> | CACCTTCCCCCAGTTCTGTT              | CACTCCGCCCTTAGTTGTGT              |
| <i>SFRP4</i>          | AGTTCCTGCACGACCCTATCA             | TAACATCCTCCGGGAGGTCC              |



Table S2.

Top 20 Under-Expressed Genes: Leiomyomas  
in Luteal Phase

| Gene ID | Entrez ID | Names and Symbols                                                            | Functions                                                                                                                                                                             | Fold Change | P Value    |
|---------|-----------|------------------------------------------------------------------------------|---------------------------------------------------------------------------------------------------------------------------------------------------------------------------------------|-------------|------------|
| DARC    | 2532      | Duffy Blood Group, Atypical Chemokine Receptor                               | Glycosylated membrane protein, non-specific receptor for several chemokines                                                                                                           | -3.55       | 0.018      |
| CCL14   | 6358      | Chemokine (C-C Motif) Ligand 14                                              | Induces changes in intracellular Ca <sup>2+</sup> concentration and enzyme release in monocytes                                                                                       | -2.82       | 0.008      |
| KRT19   | 3880      | Keratin 19                                                                   | Involved in organization of myofibers. Together with KRT8, helps to link the contractile apparatus to dystrophin at the costameres of striated muscle                                 | -2.65       | 0.031      |
| WISP2   | 8839      | WNT1 Inducible Signaling Pathway Protein 2                                   | Member of the WNT1 inducible signaling pathway (WISP) subfamily; modulation of bone turnover                                                                                          | -2.57       | 0.018      |
| PGBD5   | 79605     | PiggyBac Transposable Element Derived 5                                      | Novel transposase                                                                                                                                                                     | -2.56       | 0.0002     |
| SFRP4   | 6424      | Secreted Frizzled-Related Protein 4                                          | Acts as a soluble modulator of Wnt signaling pathway; regulation of cell growth and differentiation                                                                                   | -2.48       | 0.012      |
| SLC2A5  | 6518      | Solute Carrier Family 2 (Facilitated Glucose/Fructose Transporter), Member 5 | Primarily a fructose transporter; Cytochalasin B-sensitive carrier                                                                                                                    | -2.34       | 0.001      |
| ID3     | 3399      | Inhibitor Of DNA Binding 3, Dominant Negative Helix-Loop-Helix Protein       | Forms heterodimers with other HLH proteins, inhibiting DNA binding. Involved in Myogenesis; promoting muscle precursor cells proliferation                                            | -2.31       | 0.004      |
| LRFN5   | 14558     | Leucine Rich Repeat And Fibronectin Type III Domain Containing 5             | Cell adhesion molecule that mediates homophilic cell-cell adhesion in a Ca <sup>2+</sup> -independent manner                                                                          | -2.22       | 0.006      |
| ID1     | 3397      | Inhibitor Of DNA Binding 1, Dominant Negative Helix-Loop-Helix Protein       | Forms heterodimers with other HLH proteins, inhibiting DNA binding; endometrial carcinoma                                                                                             | -2.18       | 0.028      |
| CPXM2   | 119587    | Carboxypeptidase X (M14 Family), Member 2                                    | Cell-cell interactions                                                                                                                                                                | -2.16       | 0.034      |
| UGT8    | 7368      | UDP Glycosyltransferase 8                                                    | Catalyzes key step in the biosynthesis of galactocerebrosides (sphingolipids) of the myelin membrane of the CNS and PNS)                                                              | -2.08       | 0.030      |
| ESR1    | 2099      | Estrogen Receptor 1                                                          | Nuclear hormone receptor. Involved in the regulation of gene expression, affecting cellular proliferation and differentiation in target tissues. Essential for reproductive function. | -2.07       | 5.855 E-05 |
| CCNA1   | 8900      | Cyclin A1                                                                    | Cyclins function as regulators of CDK kinases; functions in the control of the germline meiotic cell cycle                                                                            | -2.04       | 0.037      |
| GYPC    | 2995      | Glycophorin C (Gerbig Blood Group)                                           | Integral membrane glycoprotein. Minor species carried by human erythrocytes, regulating the mechanical stability of red cells.                                                        | -2.04       | 0.014      |
| SOX17   | 64321     | SRY (Sex Determining Region Y)-Box 17                                        | Member of SOX (SRY-related HMG-box) family of transcription factors; regulation of embryonic development, determines the cell fate.                                                   | -2.00       | 0.016      |
| PGR     | 5241      | Progesterone Receptor                                                        | Mediates physiological effects of progesterone; central role in reproductive events: establishment and maintenance of pregnancy                                                       | -1.99       | 0.0003     |
| LFNG    | 3955      | LFNG O-Fucosylpeptide 3-Beta-N-Acetylglucosaminyltransferase                 | Glycosyltransferases that act in the Notch signaling pathway to define boundaries during embryonic development                                                                        | -1.98       | 0.023      |
| CYSLTR  | 10800     | Cysteinyl Leukotriene Receptor 1                                             | Receptor for cysteinyl leukotrienes mediating bronchoconstriction                                                                                                                     | -1.97       | 0.0003     |
| OR2A9P  | 441295    | Olfactory Receptor, Family 2, Subfamily A, Member 9 Pseudogene               | Responsible for the recognition and G protein-mediated transduction of odorant signals.                                                                                               | -1.94       | 0.014      |

Top 20 Over-Expressed Genes: Leiomyomas  
in Luteal Phase

| Gene ID | Entrez ID | Names and Symbols                                      | Functions                                                                                                                                                | Fold Change | P Value |
|---------|-----------|--------------------------------------------------------|----------------------------------------------------------------------------------------------------------------------------------------------------------|-------------|---------|
| Hes 6   | 55502     | Hes Family BHLH Transcription Factor 6                 | Transcription repressor; regulation of cell differentiation                                                                                              | 3.01        | 0.008   |
| ITPKA   | 3706      | Inositol-Trisphosphate 3-Kinase A                      | Regulates inositol phosphate metabolism (important for cell signaling)                                                                                   | 2.82        | 0.031   |
| CORIN   | 10699     | Corin, Serine Peptidase                                | Converts pro-atrial natriuretic peptide to biologically active atrial natriuretic peptide                                                                | 2.70        | 0.049   |
| STX1A   | 6804      | Syntaxin 1A (Brain)                                    | Docking of synaptic vesicles with the presynaptic plasma membrane                                                                                        | 2.23        | 0.044   |
| ZBTB16  | 7704      | Zinc Finger And BTB Domain Containing 16               | Cell cycle progression, interacts with a histone deacetylase                                                                                             | 2.09        | 0.013   |
| PI15    | 51050     | Peptidase Inhibitor 15                                 | Trypsin inhibitor, possible role in central nervous system                                                                                               | 2.07        | 0.020   |
| PRKD1   | 5587      | Protein Kinase D1                                      | Serine/threonine kinase; membrane receptor signaling, transport at the Golgi, protection from oxidative stress, regulation of cell motility and adhesion | 2.06        | 0.027   |
| C1QL1   | 10882     | Complement Component 1, Q Subcomponent-Like 1          | May regulate the number of excitatory synapses formed on neurons                                                                                         | 1.96        | 0.009   |
| RHBDL3  | 2E+05     | Rhomboid, Veinlet-Like 3                               | Involved in intramembrane proteolysis and subsequent release of functional polypeptides from their membrane anchors                                      | 1.91        | 0.045   |
| RHGEF   | 23370     | Rho/Rac Guanine Nucleotide Exchange Factor (GEF) 18    | Cytoskeletal rearrangements, gene transcription, cell growth and motility                                                                                | 1.75        | 0.009   |
| EEF2K   | 29904     | Eukaryotic Elongation Factor-2 Kinase                  | Protein kinase in the calmodulin-mediated signaling pathway that links activation of cell surface receptors to cell division                             | 1.74        | 0.001   |
| KCNG1   | 3755      | Potassium Voltage-Gated Channel, Subfamily G, Member 1 | Member of the potassium channel, voltage-gated, subfamily G                                                                                              | 1.69        | 0.030   |
| ETV7    | 51513     | Ets Variant 7                                          | Transcription factor; development and differentiation, oncogenesis, primarily in hematopoietic tissues                                                   | 1.65        | 0.010   |
| SMOX    | 54498     | Spermine Oxidase                                       | Cell cycle modulation, scavenging reactive oxygen species, and the control of gene expression                                                            | 1.65        | 0.039   |
| HIF3A   | 64334     | Hypoxia Inducible Factor 3, Alpha Subunit              | Transcription factor that regulates many adaptive responses to low oxygen tension (hypoxia)                                                              | 1.64        | 0.010   |
| ITGA9   | 3680      | Integrin, Alpha 9                                      | Forms an integrin that is a receptor for VCAM1, cytotactin and osteopontin                                                                               | 1.62        | 0.044   |
| ARID3A  | 1820      | AT Rich Interactive Domain 3A (BRIGHT-Like)            | Important for normal embryogenesis, cell cycle control, transcriptional regulation                                                                       | 1.52        | 0.004   |
| KLF15   | 28999     | Kruppel-Like Factor 15                                 | Transcriptional regulator; mediator of ER stress-induced insulin resistance, cardiac hypertrophy                                                         | 1.50        | 0.027   |
| GPSM1   | 26086     | G-Protein Signaling Modulator 1                        | Influences the basal activity of G-protein signaling systems                                                                                             | 1.50        | 0.041   |
| ZMAT4   | 79698     | Zinc Finger, Matrix-Type 4                             | Function not currently well established                                                                                                                  | 1.44        | 0.001   |

| <b>Gene</b> | <b>Betweenness Centrality</b> | <b>Degree (number of interacting partner)</b> |
|-------------|-------------------------------|-----------------------------------------------|
| CDH5        | 0.30                          | 17                                            |
| ESR1        | 0.28                          | 19                                            |
| CCR1        | 0.22                          | 18                                            |
| PCDH10      | 0.19                          | 7                                             |
| CCL5        | 0.13                          | 14                                            |
| GZMK        | 0.11                          | 16                                            |
| WISP2       | 0.09                          | 3                                             |
| IL2RB       | 0.08                          | 15                                            |
| SOX18       | 0.08                          | 12                                            |
| CFI         | 0.07                          | 5                                             |
| CALCRL      | 0.06                          | 11                                            |
| ERG         | 0.06                          | 8                                             |
| GNG11       | 0.06                          | 8                                             |
| KCNG1       | 0.06                          | 5                                             |
| TCF21       | 0.05                          | 8                                             |
| LCK         | 0.05                          | 16                                            |
| GPM6A       | 0.05                          | 6                                             |
| IGFBP5      | 0.05                          | 5                                             |
| PHF15       | 0.04                          | 3                                             |
| GIPC2       | 0.04                          | 2                                             |
| RPL12       | 0.04                          | 9                                             |
| VWF         | 0.04                          | 9                                             |
| EDN1        | 0.04                          | 10                                            |
| APEX1       | 0.03                          | 4                                             |
| ID1         | 0.03                          | 6                                             |
| CD79B       | 0.03                          | 6                                             |
| CCR10       | 0.02                          | 5                                             |
| SFRP4       | 0.02                          | 5                                             |
| PBX1        | 0.02                          | 5                                             |
| CCNA1       | 0.02                          | 4                                             |
| TSPAN7      | 0.02                          | 3                                             |
| STX1A       | 0.02                          | 3                                             |
| NRIP1       | 0.02                          | 2                                             |
| LGALS2      | 0.02                          | 2                                             |
| EEF2K       | 0.02                          | 2                                             |
| VWA5A       | 0.02                          | 4                                             |
| DUSP6       | 0.02                          | 5                                             |
| PGR         | 0.02                          | 6                                             |
| CD247       | 0.01                          | 18                                            |
| PRF1        | 0.01                          | 6                                             |
| DARC        | 0.01                          | 3                                             |
| KLRB1       | 0.01                          | 8                                             |
| ETV7        | 0.01                          | 3                                             |
| FBP1        | 0.01                          | 5                                             |
| CD3D        | 0.01                          | 18                                            |
| SLC2A5      | 0.01                          | 2                                             |

|           |      |    |
|-----------|------|----|
| CD3G      | 0.01 | 15 |
| KLF15     | 0.01 | 3  |
| TSPAN12   | 0.01 | 5  |
| PTPRN2    | 0.01 | 3  |
| NCAM2     | 0.01 | 3  |
| THSD1     | 0.01 | 6  |
| HERC6     | 0.01 | 3  |
| FCGR3B    | 0.00 | 5  |
| KLRD1     | 0.00 | 7  |
| ZBTB16    | 0.00 | 2  |
| ITK       | 0.00 | 13 |
| CD8A      | 0.00 | 13 |
| MAP4K1    | 0.00 | 7  |
| HIF3A     | 0.00 | 3  |
| ZAP70     | 0.00 | 10 |
| TRAF3IP3  | 0.00 | 5  |
| CLEC1A    | 0.00 | 5  |
| ITGA9     | 0.00 | 3  |
| ITPKA     | 0.00 | 3  |
| GZMH      | 0.00 | 5  |
| GNLY      | 0.00 | 5  |
| CD6       | 0.00 | 4  |
| PGBD5     | 0.00 | 4  |
| RPS8      | 0.00 | 4  |
| RAMP3     | 0.00 | 3  |
| SH3KBP1   | 0.00 | 2  |
| PRKD1     | 0.00 | 2  |
| PMEPA1    | 0.00 | 2  |
| PI15      | 0.00 | 2  |
| KRT19     | 0.00 | 2  |
| CCL23     | 0.00 | 2  |
| CCL14     | 0.00 | 2  |
| ZMAT4     | 0.00 | 1  |
| ZFP69B    | 0.00 | 1  |
| TNFRSF10A | 0.00 | 1  |
| TLL1      | 0.00 | 1  |
| TIAM1     | 0.00 | 1  |
| SYBU      | 0.00 | 1  |
| SFRP1     | 0.00 | 1  |
| RAMP2     | 0.00 | 1  |
| RAMP1     | 0.00 | 1  |
| PKIG      | 0.00 | 1  |
| PDE10A    | 0.00 | 1  |
| NR5A2     | 0.00 | 1  |
| LIFR      | 0.00 | 1  |
| ID3       | 0.00 | 1  |
| ICA1      | 0.00 | 1  |

|          |      |   |
|----------|------|---|
| HOXB8    | 0.00 | 1 |
| FOXP2    | 0.00 | 1 |
| FOXP1    | 0.00 | 1 |
| CYSLTR1  | 0.00 | 1 |
| CORO2A   | 0.00 | 1 |
| CCDC68   | 0.00 | 1 |
| C1QL1    | 0.00 | 1 |
| ATP5S    | 0.00 | 1 |
| ATP5J    | 0.00 | 1 |
| ASRGL1   | 0.00 | 1 |
| ARHGEF3  | 0.00 | 1 |
| ARHGEF18 | 0.00 | 1 |
| ACACA    | 0.00 | 1 |
